# Supplementary material
Source: publisher site journal article supplement (https://studysites.sagepub.com/gribben/Web%20Material%20(Appendix)/Gribben_Web%20Material%20(Appendix)_Ch-03.pdf)
Supplement: Supplementary file 1 [file Gribben_Web%20Material%20(Appendix)_Ch-03.pdf]

### Appendix 3: Activity 3.3 Answers

---

always read your notes immediately after the lecture

aids your understanding of the lecture and is the start of your revision

type up or rewrite notes

helps your reading and understanding, and is another way of revising; also lets you complete details

compare notes with others

lets you fill in any gaps, giving a fuller set of notes

annotate any thoughts, ideas and questions

provides a point of reference for future research and discussion

link new information to what you already know

facilitates both a global understanding of the topic and deeper learning

talk lectures over with others

promotes deeper thinking and learning and gives ideas for future note-taking techniques

file notes systematically as you make them

makes it easier to retrieve information

---
